# Supplementary material for: Accuracy and reproducibility of somatic point mutation calling in clinical-type targeted sequencing data
Source: PubMed Central journal article supplement (PMC7560075; doi:10.1186/s12920-020-00803-z), 2020-10-15
Supplement: 12920_2020_803_MOESM1_ESM.pdf [file 12920_2020_803_MOESM1_ESM.pdf]

Supplementary Material for:

Accuracy and Reproducibility of Somatic Point Mutation Calling in Clinical-Type  
Targeted Sequencing Data

Ali Karimnezhad, Gareth A Palidwor, Kednapa Thavorn, David J Stewart, Pearl A  
Campbell, Bryan Lo, Theodore J. Perkins

Table 1: TST170–GM12878 default parameters

| Caller   | Rep | NumCalls | TP  | FP     | FN | Sens.   | Prec.     |
|----------|-----|----------|-----|--------|----|---------|-----------|
| Mutect2  | 1   | 514      | 340 | 174    | 3  | 0.99125 | 0.66148   |
|          | 2   | 477      | 338 | 139    | 5  | 0.98542 | 0.7086    |
|          | 3   | 416      | 339 | 77     | 4  | 0.98834 | 0.8149    |
|          | 4   | 721      | 339 | 382    | 4  | 0.98834 | 0.47018   |
|          | 5   | 769      | 338 | 431    | 5  | 0.98542 | 0.43953   |
|          | 6   | 766      | 339 | 427    | 4  | 0.98834 | 0.44256   |
| Samtools | 1   | 325816   | 342 | 325474 | 1  | 0.99708 | 0.0010497 |
|          | 2   | 127858   | 341 | 127517 | 2  | 0.99417 | 0.002667  |
|          | 3   | 206361   | 341 | 206020 | 2  | 0.99417 | 0.0016524 |
|          | 4   | 145498   | 342 | 145156 | 1  | 0.99708 | 0.0023505 |
|          | 5   | 136664   | 342 | 136322 | 1  | 0.99708 | 0.0025025 |
|          | 6   | 138410   | 342 | 138068 | 1  | 0.99708 | 0.0024709 |
| VarDict  | 1   | 347      | 342 | 5      | 1  | 0.99708 | 0.98559   |
|          | 2   | 355      | 340 | 15     | 3  | 0.99125 | 0.95775   |
|          | 3   | 351      | 341 | 10     | 2  | 0.99417 | 0.97151   |
|          | 4   | 346      | 342 | 4      | 1  | 0.99708 | 0.98844   |
|          | 5   | 344      | 341 | 3      | 2  | 0.99417 | 0.99128   |
|          | 6   | 345      | 342 | 3      | 1  | 0.99708 | 0.9913    |
| VarScan2 | 1   | 729      | 342 | 387    | 1  | 0.99708 | 0.46914   |
|          | 2   | 552      | 339 | 213    | 4  | 0.98834 | 0.61413   |
|          | 3   | 593      | 340 | 253    | 3  | 0.99125 | 0.57336   |
|          | 4   | 662      | 342 | 320    | 1  | 0.99708 | 0.51662   |
|          | 5   | 629      | 342 | 287    | 1  | 0.99708 | 0.54372   |
|          | 6   | 639      | 342 | 297    | 1  | 0.99708 | 0.53521   |
| Pisces   | 1   | 1055     | 342 | 713    | 1  | 0.99708 | 0.32417   |
|          | 2   | 773      | 341 | 432    | 2  | 0.99417 | 0.44114   |
|          | 3   | 783      | 341 | 442    | 2  | 0.99417 | 0.4355    |
|          | 4   | 907      | 342 | 565    | 1  | 0.99708 | 0.37707   |
|          | 5   | 949      | 342 | 607    | 1  | 0.99708 | 0.36038   |
|          | 6   | 1045     | 342 | 703    | 1  | 0.99708 | 0.32727   |

Table 2: TST170–GM12877 default parameters

| Caller   | Rep | NumCalls | TP  | FP    | FN | Sens.   | Prec.     |
|----------|-----|----------|-----|-------|----|---------|-----------|
| Mutect2  | 1   | 1903     | 334 | 1569  | 2  | 0.99405 | 0.17551   |
|          | 2   | 1773     | 335 | 1438  | 1  | 0.99702 | 0.18895   |
|          | 3   | 1426     | 332 | 1094  | 4  | 0.9881  | 0.23282   |
|          | 4   | 1330     | 335 | 995   | 1  | 0.99702 | 0.25188   |
|          | 5   | 2036     | 334 | 1702  | 2  | 0.99405 | 0.16405   |
|          | 6   | 1626     | 335 | 1291  | 1  | 0.99702 | 0.20603   |
| Samtools | 1   | 50468    | 336 | 50132 | 0  | 1       | 0.0066577 |
|          | 2   | 46565    | 336 | 46229 | 0  | 1       | 0.0072157 |
|          | 3   | 42572    | 335 | 42237 | 1  | 0.99702 | 0.007869  |
|          | 4   | 62048    | 336 | 61712 | 0  | 1       | 0.0054152 |
|          | 5   | 71143    | 336 | 70807 | 0  | 1       | 0.0047229 |
|          | 6   | 62740    | 336 | 62404 | 0  | 1       | 0.0053554 |
| VarDict  | 1   | 355      | 336 | 19    | 0  | 1       | 0.94648   |
|          | 2   | 353      | 336 | 17    | 0  | 1       | 0.95184   |
|          | 3   | 364      | 335 | 29    | 1  | 0.99702 | 0.92033   |
|          | 4   | 351      | 336 | 15    | 0  | 1       | 0.95726   |
|          | 5   | 358      | 335 | 23    | 1  | 0.99702 | 0.93575   |
|          | 6   | 361      | 336 | 25    | 0  | 1       | 0.93075   |
| VarScan2 | 1   | 1242     | 335 | 907   | 1  | 0.99702 | 0.26973   |
|          | 2   | 1246     | 334 | 912   | 2  | 0.99405 | 0.26806   |
|          | 3   | 1138     | 334 | 804   | 2  | 0.99405 | 0.2935    |
|          | 4   | 1758     | 336 | 1422  | 0  | 1       | 0.19113   |
|          | 5   | 1651     | 336 | 1315  | 0  | 1       | 0.20351   |
|          | 6   | 1589     | 335 | 1254  | 1  | 0.99702 | 0.21082   |
| Pisces   | 1   | 809      | 336 | 473   | 0  | 1       | 0.41533   |
|          | 2   | 813      | 336 | 477   | 0  | 1       | 0.41328   |
|          | 3   | 732      | 335 | 397   | 1  | 0.99702 | 0.45765   |
|          | 4   | 883      | 336 | 547   | 0  | 1       | 0.38052   |
|          | 5   | 883      | 336 | 547   | 0  | 1       | 0.38052   |
|          | 6   | 827      | 336 | 491   | 0  | 1       | 0.40629   |

Table 3: OF-GM12878 default parameters

| Caller   | Rep | NumCalls | TP | FP    | FN | Sens.   | Prec.     |
|----------|-----|----------|----|-------|----|---------|-----------|
| Mutect2  | 1   | 55       | 25 | 30    | 1  | 0.96154 | 0.45455   |
|          | 2   | 48       | 26 | 22    | 0  | 1       | 0.54167   |
|          | 3   | 41       | 26 | 15    | 0  | 1       | 0.63415   |
| Samtools | 1   | 21578    | 26 | 21552 | 0  | 1       | 0.0012049 |
|          | 2   | 12704    | 26 | 12678 | 0  | 1       | 0.0020466 |
|          | 3   | 9171     | 26 | 9145  | 0  | 1       | 0.002835  |
| VarDict  | 1   | 27       | 26 | 1     | 0  | 1       | 0.96296   |
|          | 2   | 26       | 25 | 1     | 1  | 0.96154 | 0.96154   |
|          | 3   | 27       | 26 | 1     | 0  | 1       | 0.96296   |
| VarScan2 | 1   | 67       | 26 | 41    | 0  | 1       | 0.38806   |
|          | 2   | 145      | 26 | 119   | 0  | 1       | 0.17931   |
|          | 3   | 238      | 26 | 212   | 0  | 1       | 0.10924   |
| ITVC     | 1   | 315      | 25 | 290   | 1  | 0.96154 | 0.079365  |
|          | 2   | 315      | 25 | 290   | 1  | 0.96154 | 0.079365  |
|          | 3   | 314      | 25 | 289   | 1  | 0.96154 | 0.079618  |

Table 4: OF-GM12877 default parameters

| Caller   | Rep | NumCalls | TP | FP    | FN | Sens.   | Prec.      |
|----------|-----|----------|----|-------|----|---------|------------|
| Mutect2  | 1   | 40       | 22 | 18    | 2  | 0.91667 | 0.55       |
|          | 2   | 52       | 23 | 29    | 1  | 0.95833 | 0.44231    |
|          | 3   | 56       | 22 | 34    | 2  | 0.91667 | 0.39286    |
| Samtools | 1   | 17770    | 24 | 17746 | 0  | 1       | 0.0013506  |
|          | 2   | 20949    | 24 | 20925 | 0  | 1       | 0.0011456  |
|          | 3   | 24386    | 24 | 24362 | 0  | 1       | 0.00098417 |
| VarDict  | 1   | 23       | 23 | 0     | 1  | 0.95833 | 1          |
|          | 2   | 24       | 23 | 1     | 1  | 0.95833 | 0.95833    |
|          | 3   | 24       | 23 | 1     | 1  | 0.95833 | 0.95833    |
| VarScan2 | 1   | 49       | 24 | 25    | 0  | 1       | 0.4898     |
|          | 2   | 53       | 24 | 29    | 0  | 1       | 0.45283    |
|          | 3   | 50       | 24 | 26    | 0  | 1       | 0.48       |
| ITVC     | 1   | 325      | 23 | 302   | 1  | 0.95833 | 0.070769   |
|          | 2   | 325      | 23 | 302   | 1  | 0.95833 | 0.070769   |
|          | 3   | 325      | 23 | 302   | 1  | 0.95833 | 0.070769   |

Table 5: TST170–GM12878 consistent parameters

| Caller   | Rep | NumCalls | TP  | FP   | FN | Sens.   | Prec.   |
|----------|-----|----------|-----|------|----|---------|---------|
| Mutect2  | 1   | 502      | 341 | 161  | 2  | 0.99417 | 0.67928 |
|          | 2   | 472      | 337 | 135  | 6  | 0.98251 | 0.71398 |
|          | 3   | 409      | 339 | 70   | 4  | 0.98834 | 0.82885 |
|          | 4   | 703      | 340 | 363  | 3  | 0.99125 | 0.48364 |
|          | 5   | 755      | 340 | 415  | 3  | 0.99125 | 0.45033 |
|          | 6   | 754      | 340 | 414  | 3  | 0.99125 | 0.45093 |
| Samtools | 1   | 784      | 343 | 441  | 0  | 1       | 0.4375  |
|          | 2   | 1354     | 340 | 1014 | 3  | 0.99125 | 0.25111 |
|          | 3   | 1079     | 342 | 737  | 1  | 0.99708 | 0.31696 |
|          | 4   | 700      | 343 | 357  | 0  | 1       | 0.49    |
|          | 5   | 731      | 343 | 388  | 0  | 1       | 0.46922 |
|          | 6   | 715      | 343 | 372  | 0  | 1       | 0.47972 |
| VarDict  | 1   | 378      | 343 | 35   | 0  | 1       | 0.90741 |
|          | 2   | 679      | 340 | 339  | 3  | 0.99125 | 0.50074 |
|          | 3   | 546      | 342 | 204  | 1  | 0.99708 | 0.62637 |
|          | 4   | 415      | 343 | 72   | 0  | 1       | 0.82651 |
|          | 5   | 465      | 342 | 123  | 1  | 0.99708 | 0.73548 |
|          | 6   | 435      | 343 | 92   | 0  | 1       | 0.78851 |
| VarScan2 | 1   | 685      | 343 | 342  | 0  | 1       | 0.50073 |
|          | 2   | 540      | 338 | 202  | 5  | 0.98542 | 0.62593 |
|          | 3   | 580      | 341 | 239  | 2  | 0.99417 | 0.58793 |
|          | 4   | 636      | 343 | 293  | 0  | 1       | 0.53931 |
|          | 5   | 605      | 343 | 262  | 0  | 1       | 0.56694 |
|          | 6   | 615      | 343 | 272  | 0  | 1       | 0.55772 |
| Pisces   | 1   | 961      | 343 | 618  | 0  | 1       | 0.35692 |
|          | 2   | 707      | 340 | 367  | 3  | 0.99125 | 0.48091 |
|          | 3   | 699      | 342 | 357  | 1  | 0.99708 | 0.48927 |
|          | 4   | 804      | 343 | 461  | 0  | 1       | 0.42662 |
|          | 5   | 849      | 343 | 506  | 0  | 1       | 0.404   |
|          | 6   | 780      | 343 | 437  | 0  | 1       | 0.43974 |

Table 6: TST170–GM12877 consistent parameters

| Caller   | Rep | NumCalls | TP  | FP   | FN | Sens.   | Prec.    |
|----------|-----|----------|-----|------|----|---------|----------|
| Mutect2  | 1   | 1873     | 333 | 1540 | 3  | 0.99107 | 0.17779  |
|          | 2   | 1751     | 333 | 1418 | 3  | 0.99107 | 0.19018  |
|          | 3   | 1422     | 331 | 1091 | 5  | 0.98512 | 0.23277  |
|          | 4   | 1297     | 335 | 962  | 1  | 0.99702 | 0.25829  |
|          | 5   | 1978     | 334 | 1644 | 2  | 0.99405 | 0.16886  |
|          | 6   | 1595     | 334 | 1261 | 2  | 0.99405 | 0.2094   |
| Samtools | 1   | 3909     | 335 | 3574 | 1  | 0.99702 | 0.0857   |
|          | 2   | 4419     | 334 | 4085 | 2  | 0.99405 | 0.075583 |
|          | 3   | 4494     | 334 | 4160 | 2  | 0.99405 | 0.074321 |
|          | 4   | 3883     | 336 | 3547 | 0  | 1       | 0.086531 |
|          | 5   | 3471     | 336 | 3135 | 0  | 1       | 0.096802 |
|          | 6   | 4571     | 335 | 4236 | 1  | 0.99702 | 0.073288 |
| VarDict  | 1   | 1406     | 335 | 1071 | 1  | 0.99702 | 0.23826  |
|          | 2   | 1518     | 334 | 1184 | 2  | 0.99405 | 0.22003  |
|          | 3   | 2038     | 334 | 1704 | 2  | 0.99405 | 0.16389  |
|          | 4   | 1164     | 336 | 828  | 0  | 1       | 0.28866  |
|          | 5   | 1056     | 335 | 721  | 1  | 0.99702 | 0.31723  |
|          | 6   | 1101     | 335 | 766  | 1  | 0.99702 | 0.30427  |
| VarScan2 | 1   | 1162     | 335 | 827  | 1  | 0.99702 | 0.2883   |
|          | 2   | 1194     | 333 | 861  | 3  | 0.99107 | 0.27889  |
|          | 3   | 1073     | 333 | 740  | 3  | 0.99107 | 0.31034  |
|          | 4   | 1567     | 336 | 1231 | 0  | 1       | 0.21442  |
|          | 5   | 1485     | 336 | 1149 | 0  | 1       | 0.22626  |
|          | 6   | 1428     | 335 | 1093 | 1  | 0.99702 | 0.23459  |
| Pisces   | 1   | 676      | 335 | 341  | 1  | 0.99702 | 0.49556  |
|          | 2   | 655      | 334 | 321  | 2  | 0.99405 | 0.50992  |
|          | 3   | 626      | 334 | 292  | 2  | 0.99405 | 0.53355  |
|          | 4   | 720      | 336 | 384  | 0  | 1       | 0.46667  |
|          | 5   | 743      | 336 | 407  | 0  | 1       | 0.45222  |
|          | 6   | 689      | 335 | 354  | 1  | 0.99702 | 0.48621  |

Table 7: OF-GM12878 consistent parameters

| Caller   | Rep | NumCalls | TP | FP | FN | Sens.   | Prec.   |
|----------|-----|----------|----|----|----|---------|---------|
| Mutect2  | 1   | 55       | 25 | 30 | 1  | 0.96154 | 0.45455 |
|          | 2   | 55       | 25 | 30 | 1  | 0.96154 | 0.45455 |
|          | 3   | 55       | 25 | 30 | 1  | 0.96154 | 0.45455 |
| Samtools | 1   | 63       | 26 | 37 | 0  | 1       | 0.4127  |
|          | 2   | 63       | 26 | 37 | 0  | 1       | 0.4127  |
|          | 3   | 63       | 26 | 37 | 0  | 1       | 0.4127  |
| VarDict  | 1   | 34       | 26 | 8  | 0  | 1       | 0.76471 |
|          | 2   | 34       | 26 | 8  | 0  | 1       | 0.76471 |
|          | 3   | 34       | 26 | 8  | 0  | 1       | 0.76471 |
| VarScan2 | 1   | 64       | 26 | 38 | 0  | 1       | 0.40625 |
|          | 2   | 64       | 26 | 38 | 0  | 1       | 0.40625 |
|          | 3   | 64       | 26 | 38 | 0  | 1       | 0.40625 |
| ITVC     | 1   | 23       | 19 | 4  | 7  | 0.73077 | 0.82609 |
|          | 2   | 25       | 21 | 4  | 5  | 0.80769 | 0.84    |
|          | 3   | 22       | 19 | 3  | 7  | 0.73077 | 0.86364 |

Table 8: OF-GM12877 consistent parameters

| Caller   | Rep | NumCalls | TP | FP | FN | Sens.   | Prec.   |
|----------|-----|----------|----|----|----|---------|---------|
| Mutect2  | 1   | 41       | 22 | 19 | 2  | 0.91667 | 0.53659 |
|          | 2   | 53       | 23 | 30 | 1  | 0.95833 | 0.43396 |
|          | 3   | 58       | 22 | 36 | 2  | 0.91667 | 0.37931 |
| Samtools | 1   | 53       | 24 | 29 | 0  | 1       | 0.45283 |
|          | 2   | 60       | 24 | 36 | 0  | 1       | 0.4     |
|          | 3   | 48       | 24 | 24 | 0  | 1       | 0.5     |
| VarDict  | 1   | 27       | 24 | 3  | 0  | 1       | 0.88889 |
|          | 2   | 27       | 24 | 3  | 0  | 1       | 0.88889 |
|          | 3   | 26       | 24 | 2  | 0  | 1       | 0.92308 |
| VarScan2 | 1   | 46       | 24 | 22 | 0  | 1       | 0.52174 |
|          | 2   | 49       | 24 | 25 | 0  | 1       | 0.4898  |
|          | 3   | 47       | 24 | 23 | 0  | 1       | 0.51064 |
| ITVC     | 1   | 22       | 20 | 2  | 4  | 0.83333 | 0.90909 |
|          | 2   | 22       | 20 | 2  | 4  | 0.83333 | 0.90909 |
|          | 3   | 22       | 20 | 2  | 4  | 0.83333 | 0.90909 |

Table 9: Average sensitivity and precision on TST170 data when calls from different combinations of algorithms are intersected

| Combination                              | Sensitivity | Precision |
|------------------------------------------|-------------|-----------|
| VarDict                                  | 0.99705     | 0.49311   |
| MuTect2                                  | 0.99093     | 0.40369   |
| Pisces                                   | 0.99754     | 0.4618    |
| SAMtools                                 | 0.99754     | 0.24473   |
| VarScan2                                 | 0.99632     | 0.41095   |
| VarDict Pisces                           | 0.99705     | 0.96484   |
| VarDict VarScan2                         | 0.99582     | 0.84388   |
| MuTect2 VarDict                          | 0.99093     | 0.75731   |
| MuTect2 Pisces                           | 0.99093     | 0.94935   |
| MuTect2 SAMtools                         | 0.99093     | 0.8493    |
| MuTect2 VarScan2                         | 0.99019     | 0.86984   |
| SAMtools VarDict                         | 0.99705     | 0.62907   |
| SAMtools Pisces                          | 0.99754     | 0.75762   |
| SAMtools VarScan2                        | 0.99632     | 0.44677   |
| VarScan2 Pisces                          | 0.99632     | 0.78136   |
| VarDict VarScan2 Pisces                  | 0.99582     | 0.97315   |
| MuTect2 VarDict Pisces                   | 0.99093     | 0.9823    |
| MuTect2 VarDict VarScan2                 | 0.99019     | 0.94007   |
| MuTect2 SAMtools VarDict                 | 0.99093     | 0.92933   |
| MuTect2 SAMtools Pisces                  | 0.99093     | 0.95357   |
| MuTect2 SAMtools VarScan2                | 0.99019     | 0.87255   |
| MuTect2 VarScan2 Pisces                  | 0.99019     | 0.9538    |
| SAMtools VarDict Pisces                  | 0.99705     | 0.96968   |
| SAMtools VarDict VarScan2                | 0.99582     | 0.84519   |
| SAMtools VarScan2 Pisces                 | 0.99632     | 0.79227   |
| MuTect2 VarDict VarScan2 Pisces          | 0.99019     | 0.98277   |
| MuTect2 SAMtools VarDict Pisces          | 0.99093     | 0.98301   |
| MuTect2 SAMtools VarDict VarScan2        | 0.99019     | 0.94115   |
| MuTect2 SAMtools VarScan2 Pisces         | 0.99019     | 0.95421   |
| SAMtools VarDict VarScan2 Pisces         | 0.99582     | 0.97361   |
| MuTect2 SAMtools VarDict VarScan2 Pisces | 0.99019     | 0.98324   |



Table 10: Average sensitivity and precision on OF data when calls from different combinations of algorithms are intersected

| Combination                            | Sensitivity | Precision |
|----------------------------------------|-------------|-----------|
| VarDict                                | 1           | 0.8325    |
| MuTect2                                | 0.94605     | 0.45225   |
| ITVC                                   | 0.79487     | 0.87617   |
| SAMtools                               | 1           | 0.43182   |
| VarScan2                               | 1           | 0.45682   |
| VarDict ITVC                           | 0.79487     | 0.93749   |
| VarDict VarScan2                       | 1           | 0.83819   |
| MuTect2 VarDict                        | 0.94605     | 0.92585   |
| MuTect2 ITVC                           | 0.7687      | 0.88519   |
| MuTect2 SAMtools                       | 0.94605     | 0.86473   |
| MuTect2 VarScan2                       | 0.94605     | 0.86473   |
| SAMtools VarDict                       | 1           | 0.84389   |
| SAMtools ITVC                          | 0.79487     | 0.87617   |
| SAMtools VarScan2                      | 1           | 0.47836   |
| VarScan2 ITVC                          | 0.79487     | 0.87617   |
| VarDict VarScan2 ITVC                  | 0.79487     | 0.93749   |
| MuTect2 VarDict ITVC                   | 0.7687      | 0.95036   |
| MuTect2 VarDict VarScan2               | 0.94605     | 0.92585   |
| MuTect2 SAMtools VarDict               | 0.94605     | 0.92585   |
| MuTect2 SAMtools ITVC                  | 0.7687      | 0.88519   |
| MuTect2 SAMtools VarScan2              | 0.94605     | 0.86473   |
| MuTect2 VarScan2 ITVC                  | 0.7687      | 0.88519   |
| SAMtools VarDict ITVC                  | 0.79487     | 0.93749   |
| SAMtools VarDict VarScan2              | 1           | 0.84389   |
| SAMtools VarScan2 ITVC                 | 0.79487     | 0.87617   |
| MuTect2 VarDict VarScan2 ITVC          | 0.7687      | 0.95036   |
| MuTect2 SAMtools VarDict ITVC          | 0.7687      | 0.95036   |
| MuTect2 SAMtools VarDict VarScan2      | 0.94605     | 0.92585   |
| MuTect2 SAMtools VarScan2 ITVC         | 0.7687      | 0.88519   |
| SAMtools VarDict VarScan2 ITVC         | 0.79487     | 0.93749   |
| MuTect2 SAMtools VarDict VarScan2 ITVC | 0.7687      | 0.95036   |
